# Supplementary material for: Proteases and Protease Inhibitors of Urinary Extracellular Vesicles in Diabetic Nephropathy
Source: Hindawi journal article supplement (doi:10.1155/2015/289734), 2015-01-01

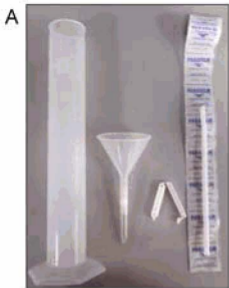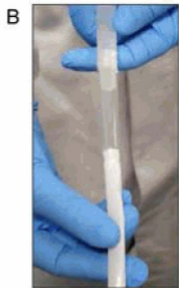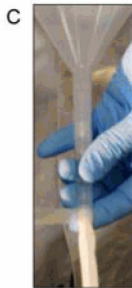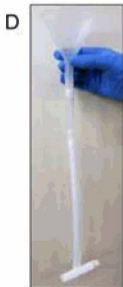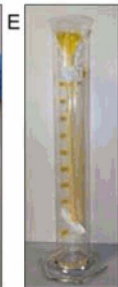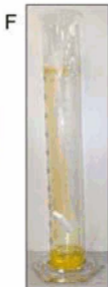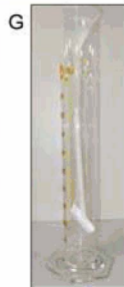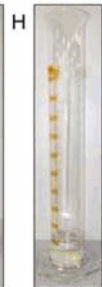

Supplement: f1 [file 289734.f1.pdf]
