# Supplementary material for: Proteases and Protease Inhibitors of Urinary Extracellular Vesicles in Diabetic Nephropathy
Source: J Diabetes Res. 2015 Mar 19;2015:289734. doi: 10.1155/2015/289734 (PMC4383158; doi:10.1155/2015/289734)
Supplement: Supplementary file 2 [file 289734.f2.xls]

## Sheet: Proteases array
						Proteases
						Fold changing ↑ 1,000 kDa
Coordinates		Uniprot number	Gene Name	Vesiclepedia	Isoform Specificty	Normo	Micro	Macro
A3, A4	ADAM8	P78325	ADAM8	X	Ectodomain	1.45996	-1.29928	-1.49717
A5, A6	ADAM9	Q13443	ADAM9	√	Ectodomain	-2.16337	-2.62432	-2.91794
A7, A8	ADAMTS1	Q9UHI8	ADAMTS1	√	Proform	1.09397	1.48238	1.25862
A9, A10	ADAMTS13	Q76LX8	ADAMTS13	√ as mRNA	Active	-1.04703	-1.1857	-1.36938
A11, A12	Cathepsin A	P10619	CTSA	√	Proform and Active	1.45829	5.93231	4.34231
A13, A14	Cathepsin B	P07858	CTSB	√	Proform	1.22631	-1.13453	1.02093
A15, A16	Cathepsin C	P53634	CTSC	√	Proform and Active	2.4686	2.98098	2.50481
A17, A18	Cathepsin D	P07339	CTSD	√	Proform and Active	3.99751	6.62289	6.88209
B3, B4	Cathepsin E	P14091	CTSE	√ rat and mouse	Proform and Active	-1.10604	-1.28712	-1.62687
B5, B6	Cathepsin L	P07711	CTSL1	√	Proform and Active	-1.00988	2.94873	2.26666
B7, B8	Cathepsin S	P25774	CTSS	√ mouse	Proform and Active	1.28518	0.99595	0.915839
B9, B10	Cathepsin V	O60911	CTSV	X	Proform and Active	1.05409	1.0019	-1.17579
B11, B12	Cathepsin X/Z/P	Q9UBR2	CTSZ	√	Proform and Active	2.6274	8.12687	7.18978
B13, B14	DPPIV/CD26	P27487	DPP4	√	Ectodomain	-1.84479	-1.40894	0.998679
B15, B16	Kallikrein 3/PSA	P07288	KLK3	√ as mRNA	Proform and Active	-2.12527	1.90752	1.68394
B17, B18	Kallikrein 5	Q9Y337	KLK5	√	Proform and Active	1.01977	1.18907	1.01909
C3, C4	Kallikrein 6	Q92876	KLK6	√	Proform and Active	1.6339	1.34007	-1.34524
C5, C6	Kallikrein 7	P49862	KLK7	√	Proform and Active	1.40655	1.57734	-1.1089
C7, C8	Kallikrein 10	O43240	KLK10	√ as mRNA	Proform and Active	1.86712	1.92686	1.89828
C9, C10	Kallikrein 11	Q9UBX7	KLK11	X	Proform and Active	1.41463	1.10356	-1.04868
C11, C12	Kallikrein 13	Q9UKR3	KLK13	X	Proform and Active	4.70043	4.37668	2.43982
C13, C14	MMP-1	P03956	MMP1	√	Proform and Active	-1.07895	0.921069	-1.23646
C15, C16	MMP-2	P08253	MMP2	√	Proform and Active	-1.35505	-1.49624	-1.51582
C17, C18	MMP-3	P08254	MMP3	√	Proform and Active	-1.06349	1.07466	1.06627
D3, D4	MMP-7	P09237	MMP7	√	Proform and Active	-0.945608	-1.06597	1.09011
D5, D6	MMP-8	P22894	MMP8	X	Proform and Active	-1.00209	-1.10106	-1.11151
D7, D8	MMP-9	P14780	MMP9	√	Proform and Active	6.4041	1.83329	-1.02394
D9, D10	MMP-12	P39900	MMP12	X	Proform and Active	-1.01557	-1.14514	-1.26676
D11, D12	MMP-13	P45452	MMP13	X	Proform	-1.01758	-1.07179	-1.15298
D13, D14	Neprilysin/CD10	P08473	MME		Ectodomain	-1.88581	-1.29608	-1.3731
D15, D16	Presenilin-1	P49768	PSEN1	√	N-Terminal Fragment	-1.21824	-1.03706	-1.41543
D17,D18	Proprotein Convertase 9	Q8NBP7	PCSK9	√	Active	1.18063	1.344	1.01394
E3, E4	Proteinase 3	P24158	PRTN3	√	Active	4.15094	5.2019	1.95517
E5, E6	uPA/Urokinase	P00749	PLAU	√	Proform and Active	1.15808	1.11145	-1.45988

## Sheet: Protease inhibitors array
					Protease inhbitors
					Fold changing ↑ 1,000 kDa
Coordinates		Uniprot number	Gene Name	Vesiclepedia	Normo	Micro	Macro
A3, A4	Protease Nexin II	P05067	APP	√	-1.7504	-1.37236	-1.90218
A5, A6	Cystatin A	P01040	CSTA	√	-1.34535	-1.61919	-1.73347
A7, A8	Cystatin B	P04080	CSTB	√	3.74293	2.38812	2.90632
A9, A10	Cystatin C	P01034	CST3	√	1.27252	1.36024	1.39706
A11, A12	Cystatin E/M	Q15828	CST6	√	-2.74525	-1.70897	-2.36113
A13, A14	EMMPRIN/CD147	P35613	BSG	√	-2.04862	-2.2718	-3.07823
A15, A16	Fetuin B	Q9UGM5	FETUB	X	1.10782	1.44445	1.68309
A17, A18	HAI-1	O43278	SPINT1	√ as mRNA	1.02812	1.58421	-1.04216
B3, B4	HAI-2	O43291	SPINT2	√ as mRNA	-2.38409	-2.42982	-2.82369
B5, B6	HE4/WFDC2	Q14508	WAP 5	√ as mRNA	-2.44401	-1.81435	-1.99182
B7, B8	Latexin	Q9BS40	LXN	√	-1.29906	-1.28088	-1.46798
B9, B10	Lipocalin-1	P31025	LCN1	√	-1.6162	-1.29906	-1.46941
B11, B12	Lipocalin-2/NGAL	P80188	LCN2	√	2.72312	-1.30167	-1.60698
B13, B14	RECK	O95980	RECK	√	1.05068	1.09401	-1.3345
B15, B16	Serpin A5	P05154	SERPINA5	√	-1.02733	1.32461	-1.48794
B17, B18	Serpin A8	P01019	AGT	√	-1.19156	1.78612	1.50429
C3, C4	Serpin A9	Q86WD7	SERPINA9	X	-1.20213	-1.31174	-1.39076
C5, C6	Serpin A12	Q8IW75	SERPINA12	√ as mRNA	-1.24124	-1.40689	-1.26682
C7, C8	Serpin B5	P36952	SERPINB5	√	-1.02968	1.06323	2.66811
C9, C10	Serpin B6	P35237	SERPINB6	√	-1.4298	-1.56864	-1.81398
C11, C12	Serpin B8	P50452	SERPINB8	√ as mRNA	-1.01122	1.10775	-1.28316
C13, C14	Serpin E1	P05121	SERPINE1	√	1.03168	1.09852	-1.26718
C15, C16	Serpin F1	P36955	SERPINEF1	√	-1.2304	1.6872	2.35532
C17, C18	Testican 1	Q08629	SPOCK1	X	-1.15773	1.37601	-1.14153
D3, D4	Testican 2	Q92563	SPOCK2	√ as mRNA	-1.15785	-1.22895	-1.22149
D5, D6	TFPI	P10646	TFPI	√	-1.43729	-1.46148	-1.54117
D7, D8	TFPI-2	P48307	TFPI2	X	-1.30588	-1.43837	-1.60813
D9, D10	TIMP-1	P01033	TIMP1	√	-1.31107	-1.14046	-1.569
D11, D12	TIMP-2	P16035	TIMP2	√	1.28871	-1.47005	-1.85681
D13, D14	TIMP-3	P35625	TIMP3	√	-1.04465	1.04763	-1.298
D15, D16	TIMP-4	Q99727	TIMP4	√ as mRNA	-1.04266	1.24386	-1.2612
D17,D18	Elafin	P19957	PI3	X	4.61506	2.8354	1.14684
